# Supplementary material for: Efficacy and Tolerability of Perampanel in Brain Tumor-Related Epilepsy: A Systematic Review
Source: MDPI journal article supplement (doi:10.3390/biomedicines11030651), 2023-02-21
Supplement: s1 [file s1]

**Table S1:** Search domain and search terms (Cochrane/Web of Science/Scopus/ClinicalTrial.gov/Who Trial Registry).

| Database        | MedLine/Pubmed                                                                                                                                                                                                                                                                                                                                                                                                                                                                | Embase                                                                                                                                                                                                                                                                                                                          | Cochrane                                                                                                                                                                                                                                                                        |
|-----------------|-------------------------------------------------------------------------------------------------------------------------------------------------------------------------------------------------------------------------------------------------------------------------------------------------------------------------------------------------------------------------------------------------------------------------------------------------------------------------------|---------------------------------------------------------------------------------------------------------------------------------------------------------------------------------------------------------------------------------------------------------------------------------------------------------------------------------|---------------------------------------------------------------------------------------------------------------------------------------------------------------------------------------------------------------------------------------------------------------------------------|
|                 | (("perampanel" [Supplementary Concept]<br>OR Perampanel)) AND<br>(("Epilepsy"[Mesh] OR<br>epilep*[title/abstract] OR<br>"Seizures"[Mesh] OR<br>seizure*[title/abstract]) AND<br>("Glioma"[Mesh] OR<br>glioma*[title/abstract] OR brain<br>tumor[title/abstract] OR brain<br>tumour[title/abstract] OR brain<br>cancer[title/abstract] OR brain<br>neoplasm[title/abstract] OR brain<br>metastas*[title/abstract] OR<br>"Meningioma"[Mesh] OR<br>meningioma*[title/abstract])) | ('brain cancer'/exp OR 'brain<br>cancer' OR 'brain tumor' OR<br>'brain tumour' OR 'brain<br>neoplasm' OR 'glioma'/exp OR<br>glioma OR 'brain metastas*'<br>OR 'meningioma'/exp OR<br>'meningioma') AND<br>('epilepsy'/exp OR<br>epilep*:ab,ti OR 'seizure'/exp<br>OR seizure*:ab,ti) AND<br>('perampanel'/exp OR<br>perampanel) | perampanel in Title Abstract<br>Keyword AND epilep* OR<br>seizure* in Title Abstract<br>Keyword AND brain cancer<br>OR brain tumor OR brain<br>neoplasm OR glioma OR<br>brain metastas* OR<br>meningioma in Title Abstract<br>Keyword - (Word variations<br>have been searched) |
| Database        | Scopus                                                                                                                                                                                                                                                                                                                                                                                                                                                                        | Web of Science                                                                                                                                                                                                                                                                                                                  |                                                                                                                                                                                                                                                                                 |
|                 | ( TITLE-ABS-KEY ( perampanel ) AND<br>TITLE-ABS-KEY ( brain AND cancer<br>OR brain AND tumor OR brain AND<br>neoplasm OR glioma OR brain AND<br>metastas* OR meningioma ) AND<br>TITLE-ABS-KEY ( epilep* OR seizure*<br>) )                                                                                                                                                                                                                                                   | perampanel (All Fields) and<br>brain cancer OR brain tumor<br>OR brain neoplasm OR glioma<br>OR brain metastas* OR<br>meningioma (All Fields) and<br>epilep* OR seizure* (All<br>Fields)                                                                                                                                        |                                                                                                                                                                                                                                                                                 |
| Clinical Trials |                                                                                                                                                                                                                                                                                                                                                                                                                                                                               |                                                                                                                                                                                                                                                                                                                                 |                                                                                                                                                                                                                                                                                 |
|                 | ClinicalTrial.gov                                                                                                                                                                                                                                                                                                                                                                                                                                                             | Who Trial Registry                                                                                                                                                                                                                                                                                                              |                                                                                                                                                                                                                                                                                 |
|                 | perampanel AND (brain cancer OR brain<br>tumor OR brain neoplasm OR glioma)                                                                                                                                                                                                                                                                                                                                                                                                   | perampanel AND (brain<br>cancer OR brain tumor OR<br>brain neoplasm OR glioma)                                                                                                                                                                                                                                                  |                                                                                                                                                                                                                                                                                 |
